# Supplementary material
Source: PubMed Central journal article supplement (PMC3347078)
Supplement: supp_194.9.2342_TableS1-S2.pdf [file supp_194.9.2342_TableS1-S2.pdf]

TITLE

**Characterization of *Campylobacter jejuni* RacRS reveals a role in the heat shock response, motility, and maintenance of cell length population homogeneity**

Dmitry Apel<sup>1</sup>, Jeremy Ellermeier<sup>2</sup>, Mark Pryjma<sup>1</sup>, Victor J. DiRita<sup>2</sup>, and Erin C. Gaynor<sup>1</sup>

<sup>1</sup>Department of Microbiology & Immunology, University of British Columbia Vancouver, V6T 1Z3, Canada

<sup>2</sup>Department of Microbiology and Immunology and Unit for Laboratory Animal Medicine, University of Michigan, Ann Arbor, Michigan

**Content:**

**Table S1. Primers used in the study**

**Table S2. Plasmids used in this study.**

**Table S1. Primers used in this study.**

| Primer Name   | Description                                                             | Sequence<br>5'→3' Restriction sites are underlined |
|---------------|-------------------------------------------------------------------------|----------------------------------------------------|
| racR-1        | Construction of $\Delta$ racR<br><i>Campylobacter jejuni</i>            | TCCTCAA <u>AA</u> ACCACCAA <u>AA</u> ACC           |
| racR-2        |                                                                         | AA <u>GATTATA</u> AA <u>CCCTAT</u> CACTAG          |
| racR-3        |                                                                         | AA <u>AGAATTCTA</u> ATTGTGCAAAGTCAGGATC            |
| racR-4        |                                                                         | AA <u>AGGATCC</u> ATCGGTCGCTTAAGGGTA               |
| racS-1        | Construction of $\Delta$ racS<br><i>Campylobacter jejuni</i>            | GCAATATTCCTATTATCATCTC                             |
| racS-2        |                                                                         | AGCGATTTTACTAAAAGTTAGG                             |
| racS-3        |                                                                         | AA <u>AGAATTCA</u> ATCAGTTTGGTATGAATAG             |
| racS-4        |                                                                         | AA <u>AGGATCC</u> GATGATGGAAAGCATTGC               |
| dnaJ-1        | Construction of $\Delta$ dnaJ<br><i>Campylobacter jejuni</i>            | CATAATCCTTGCATACATTTCTTTTGG                        |
| dnaJ-2        |                                                                         | AGTTGTAATCGAAGATCAAGGTAATC                         |
| dnaJ-3        |                                                                         | AA <u>AGAATTCA</u> AGAAGTTCATAATAACTTA             |
| dnaJ-4        |                                                                         | AA <u>AGAATTC</u> ACTAATTGGTTTAAAGTCTT             |
| 5'-racR-SpeI  | <i>racR</i> complementation                                             | AA <u>AACTAGT</u> AAA <u>ACTTC</u> CATAGGCTTC      |
| 3'-racR-EcoRI |                                                                         | AA <u>AGAATTC</u> ATCCTATCAGTTTATATC               |
| 5'-SmaI-luxC  | Cloning of the <i>luxCDABE</i> operon into pRY112                       | AA <u>ACCCGGG</u> AAATGGATGGCAAATAT                |
| 3'-PstI-luxE  |                                                                         | AA <u>ACTGCAG</u> CAAAGGATATCAACTATC               |
| 5'-PracR-NotI | Construction of <i>P<sub>racR</sub>-lux</i> pRY112                      | AA <u>AGCGGCCG</u> CAA <u>AACTTC</u> CATAGGCTTC    |
| 3'-PracR-SmaI |                                                                         | AA <u>ACCCGGGT</u> CTAGTGTCCCTTGTAAT               |
| 5'-PdnaJ-NotI | Construction of <i>P<sub>dnaJ</sub>-lux</i> pRY112                      | AA <u>AGCGGCCG</u> CCTTGAATACCCAC                  |
| 3'-PdnaJ-SmaI |                                                                         | AA <u>ACCCGGG</u> ATTATTCCTTTAAAAAATTT             |
| 5'-racR-EcoRI | Cloning of racR ORF into pBAD24                                         | AA <u>AGAATTC</u> AGAATGATTAATGTGTTG               |
| 3'-racR-PstI  |                                                                         | AA <u>ACTGCAG</u> TTTGGTATGAATAGAAT                |
| 5'-pBAD-XhoI  | Cloning of <i>araC</i> or <i>araC-racR</i> into pRY112- <i>luxCDABE</i> | AA <u>ACTCGAG</u> ATGCATAATGTGCCTG                 |
| 3'-pBAD-ApaI  |                                                                         | AA <u>AGGGCCCT</u> TTTTCAATATTATTGAAG              |
| 5'-SmaI-gfp   | Cloning of the <i>gfp</i> ORF into pRY112                               | AA <u>ACCCGGG</u> TTTAAGAAGGAGATATAC               |
| 3'-XhoI-gfp   |                                                                         | AA <u>ACTCGAG</u> ATTTATTTGTATAGTTCATC             |
| 5'-NotI-atpF' | Construction of <i>gfp</i> expressing strains                           | AA <u>AGCGGCCG</u> CATAATAGGTCAAAAAC               |
| 3'-SmaI-atpF' |                                                                         | AA <u>ACCCGGG</u> AATTCTCCTTGGTTAG                 |
| rpoA-F        | RT-qPCR                                                                 | CGAGCTTGCTTTGATGAGTG                               |
| rpoA-R        |                                                                         | AGTTCCACAGGAAAACCTA                                |
| dnaJ-F        | RT-qPCR                                                                 | GATCATCGCCGCTGAAGATGATACT                          |
| dnaJ-R        |                                                                         | TTCACCGCGTATGGTGGGTACTTT                           |
| dnaK-F        | RT-qPCR                                                                 | CGCGGTATGCCACAAATCGAAGTT                           |
| dnaK-R        |                                                                         | TCTCTTGAGCCCTACCTGTTGCTT                           |
| groEL-F       | RT-qPCR                                                                 | GAAGCAATTGGCGCAGCTATCGTT                           |
| groEL-R       |                                                                         | CCACACCTGCATCAAATCCTGCAT                           |

**Table S2. Plasmids used in this study.**

| Plasmid                                                      | Description                                                                                                                                     | Reference  |
|--------------------------------------------------------------|-------------------------------------------------------------------------------------------------------------------------------------------------|------------|
| pRY112                                                       | <i>Campylobacter</i> replicating plasmid with chloramphenicol resistance ( <i>cat</i> ) ORF                                                     | (76)       |
| <i>P<sub>racR</sub>-lux</i> pRY112                           | <i>Campylobacter</i> replicating plasmid with <i>luxCDABE</i> operon driven by the <i>racR</i> transcriptional regulatory region                | This study |
| <i>P<sub>dnaJ</sub>-lux</i> pRY112                           | <i>Campylobacter</i> replicating plasmid with <i>luxCDABE</i> operon driven by the <i>dnaJ</i> transcriptional regulatory region                | This study |
| <i>P<sub>dnaJ</sub>-lux/araC</i> pRY112                      | <i>E. coli</i> replicating plasmid with <i>luxCDABE</i> operon driven by the <i>dnaJ</i> transcriptional regulatory region and <i>araC</i> ORF  | This study |
| <i>P<sub>dnaJ</sub>-lux/araC/P<sub>BAD</sub>-racR</i> pRY112 | <i>E. coli</i> replicating plasmid with <i>luxCDABE</i> operon driven by the <i>dnaJ</i> transcriptional regulatory region and <i>araC-racR</i> | This study |
| <i>P<sub>atpF'</sub>-gfp</i> pRY112                          | <i>Campylobacter</i> replicating plasmid with <i>gfp</i> ORF driven by the <i>atpF'</i> transcriptional regulatory region                       | This study |
